# Supplementary material for: Impact of the Arbuscular Mycorrhizal Fungus Funneliformis mosseae on the Physiological and Defence Responses of Canna indica to Copper Oxide Nanoparticles Stress
Source: MDPI journal article supplement (doi:10.3390/jof8050513), 2022-05-16
Supplement: s1 [file s1]

# Supplementary Materials: Effects of Arbuscular Mycorrhizal Fungi on *Canna indica* Growth, Antioxidant Enzyme Activities, ROS, and Organic Acid Secretion and Stress-Response Gene Expressions Under Copper Oxide Nanoparticles Stresses

Jie Luo, Qiuxia Yan, Guo Yang and Youbao Wang

**Table S1.** Primers of *C. indica* genes used for the qRT-PCR analysis

| Gene      | Description         | Gene no.         | PCR primers (5'→3')        |
|-----------|---------------------|------------------|----------------------------|
| 18S rRNA  | 18S rRNA            |                  | GACCTACTTGTAGTATAGTTGGGGT  |
|           | (guanine-N(7))-met  |                  | TTGCGTGCCTCCGTTTC          |
| Cu-Zn SOD | hytransferase       | c99859.graph_c0  |                            |
|           | superoxide          |                  | TGGGCTGGGTCTAATGTGC        |
| GR        | dismutase [Cu-Zn]   |                  | AGAAAGAGCAGAGGATGGGGAAGAA  |
|           | 1                   | c79685.graph_c0  |                            |
| POD       | probable            |                  | GCCTGTTTGCCTACGGAACCAATAT  |
|           | glutathione         |                  | AGCAGCACCAGCCCTTT          |
| Nramp2    | S-transferase parA  | c100781.graph_c0 |                            |
|           | peroxidase          |                  | GGGGGAAGAAGCAATTTTCATCATCT |
| Nramp5    | metal transporter   | c98774.graph_c2  | GCGAAGCAGTCGTGGAA          |
|           | Nramp2-like         |                  | ACCGAGAGCTTAAGAGTAACGCGCT  |
| MT2c      | metal transporter   | c158116.graph_c0 | AGCGCGTTACTCTTAAGCTCTCGGT  |
|           | Nramp5-like         |                  | TGGAAGAAGTTCCTGGCTCACGTTG  |
| MT2a      | metallothionein-lik | c109375.graph_c1 | GCCAAGGACACAAGAAATCCGGGTC  |
|           | e protein 2c        |                  | CGTCTCCACCATATCTCAAGCCACA  |
| COPT2     | metallothionein-lik | c100495.graph_c0 | TCCTGCTGTGGCTTGAGAT        |
|           | e protein 2a        |                  | TCGTGCTCATATCTTAGTCGATCCA  |
| COPT6     | copper transporter  | c102948.graph_c1 | GAAGAACGTGTTGGATCGACTAAGA  |
|           | 2-like              |                  | ATGACCTTCTTATGGGGCAAGAACT  |
| MDH1      | copper transporter  | c103133.graph_c2 | CAAGCATCACGAGGTAGGC        |
|           | 6-like              |                  | CCTTCCTCCTCCGCTTCTCCTCAAA  |
| MDH2      | malate              | c98923.graph_c0  | TCTTGGAAGTATCAGGGTTT       |
|           | dehydrogenase       |                  | AGTCACTGAGAGTTTGTAGTTCACA  |
|           | malate              | c78333.graph_c1  | CCTTCGCTGTGAACTACAACT      |
|           | dehydrogenase       |                  | GCCTACTATAAATATGAGAGAGAGC  |
|           |                     | c99859.graph_c0  | GCTCTCTCATATTTATAGTAGGC    |

|              |                                              |                  |                                                     |
|--------------|----------------------------------------------|------------------|-----------------------------------------------------|
| <i>ALMT1</i> | aluminum-activate<br>d malate<br>transporter | c79685.graph_c0  | TCCTGTAAACCTCAGGTTGACCACCC<br>TTGTGCTCAGGCTGTCTACC  |
| <i>ALMT2</i> | aluminum-activate<br>d malate<br>transporter | c100781.graph_c0 | GCGTCGACCCACTCCTCCTTGACGT<br>GAGGAAGATAAGGAGGGAGATG |
| <i>CS1</i>   | citrate synthase                             | c98774.graph_c2  | TCACGTGAGCTCTCATCCCCATCTC<br>AGCAACCCTGAGACCAAACCT  |
| <i>CS2</i>   | citrate synthase                             | c158116.graph_c0 | TCGAACTATCTCCTGTTGGATTGGA<br>CGGGCTTCACGACCAAT      |

---
